# Supplementary material for: AKAP5 complex facilitates purinergic modulation of vascular L-type Ca2+ channel CaV1.2
Source: PubMed Central journal article supplement (PMC7575592; doi:10.1038/s41467-020-18947-y), 2020-10-20
Supplement: 41467_2020_18947_MOESM1_ESM.pdf [file 41467_2020_18947_MOESM1_ESM.pdf]

## Supplementary Information

### **AKAP5 complex facilitates purinergic modulation of vascular L-type Ca<sup>2+</sup> channel Cav1.2**

Maria Paz Prada<sup>1\*</sup>, Arsalan U. Syed<sup>1\*</sup>, Gopireddy R. Reddy<sup>1\*</sup>, Miguel Martín-Aragón Baudel<sup>1</sup>, Víctor A. Flores-Tamez<sup>1</sup>, Kent C. Sasse<sup>2</sup>, Sean M. Ward<sup>3</sup>, Padmini Sirish<sup>4</sup>, Nipavan Chiamvimonvat<sup>1,4,5</sup>, Peter Bartels<sup>1</sup>, Eamonn J. Dickson<sup>6</sup>, Johannes W. Hell<sup>1</sup>, John D. Scott<sup>7</sup>, Luis F. Santana<sup>6</sup>, Yang K. Xiang<sup>1,5</sup>, Manuel F. Navedo<sup>1</sup>, and Madeline Nieves-Cintrón<sup>1</sup>

<sup>1</sup>Department of Pharmacology, University of California Davis, Davis, CA, USA 95616,

<sup>2</sup>Sasse Surgical Associates, Reno, NV, USA 89502, <sup>3</sup>Department of Physiology and Cell Biology, University of Nevada Reno, Reno, NV, USA 89557, <sup>4</sup>Department of Internal Medicine, University of California Davis, Davis, CA, USA 95616, <sup>5</sup>VA Northern California Healthcare System, Mather, CA, USA 95655, <sup>6</sup>Department of Physiology and Membrane Biology, University of California Davis, Davis, CA, USA 95616, and

<sup>7</sup>Department of Pharmacology, University of Washington Seattle, Seattle, WA, USA

98195

## Supplemental Figures and Tables

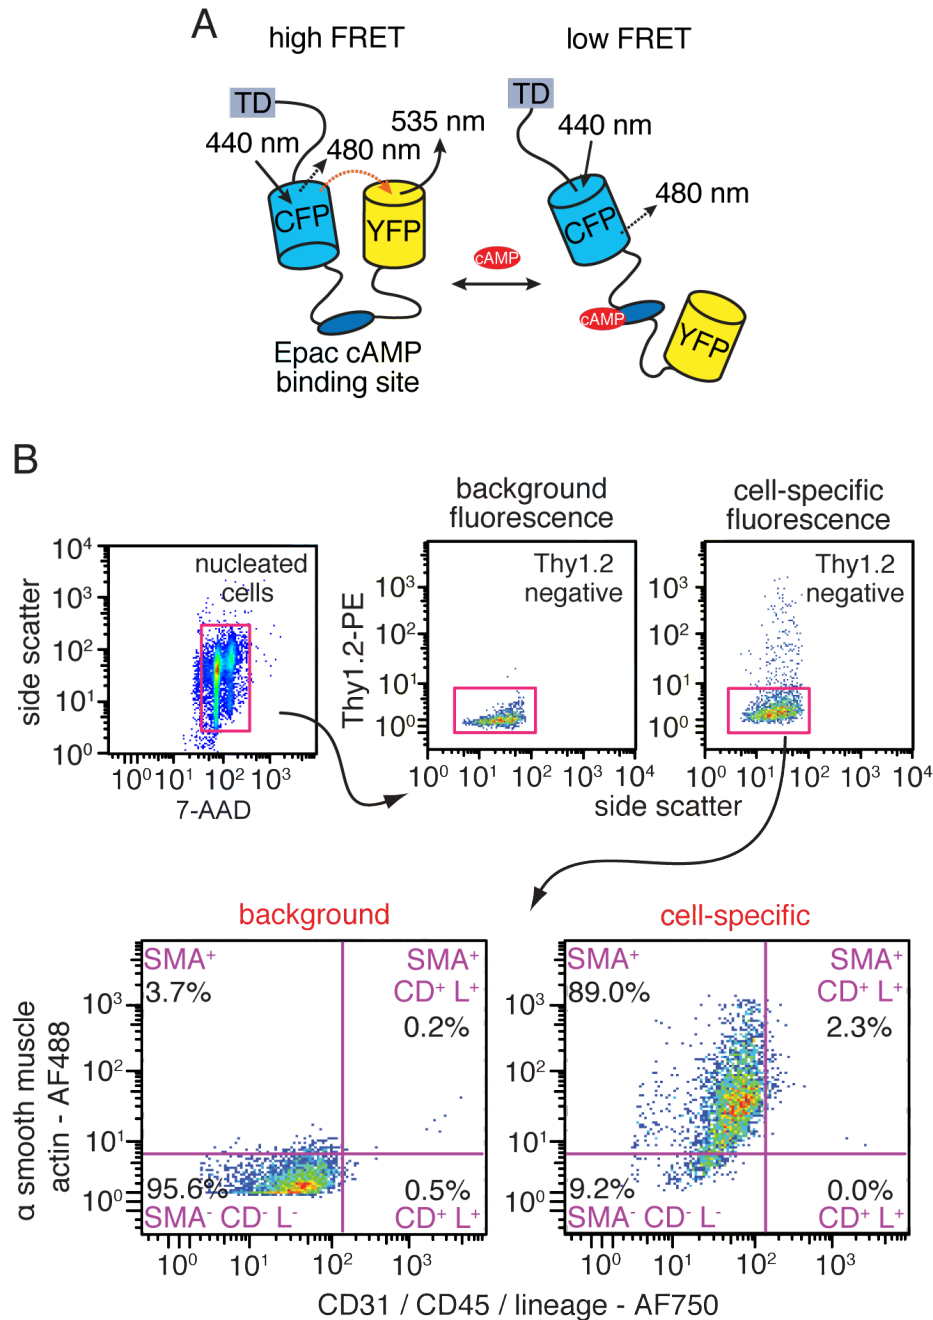

**Supplementary Figure 1: Diagram of the ICUE3-PM sensor and flow cytometry analysis of unpassaged primary cultured arterial myocytes. A) Schematic of the design for the plasma membrane-targeted Epac1-camps-based FRET sensor (ICUE3-PM). TD = targeting domain. B) Flow cytometry analysis of arterial myocytes ( $\alpha$ -**

SMA<sup>+</sup>/Thy<sup>-</sup>/CD31<sup>-</sup>/CD45<sup>-</sup>/Lin<sup>-</sup>). Nucleated cells were selected from the mixed population based on the incorporation of 7-AAD (top left panel). Selection of non-fibroblasts (Thy1.2<sup>neg</sup>) are shown in the top middle and right panels. Arterial myocytes were identified as CD31<sup>-</sup>/CD45<sup>-</sup>/lineage negative and  $\alpha$ -smooth muscle actin positive in the bottom panels. X and Y-axes represent arbitrary units. Representative results are shown (n = 4 preparations). Source data are provided as Source Data file.

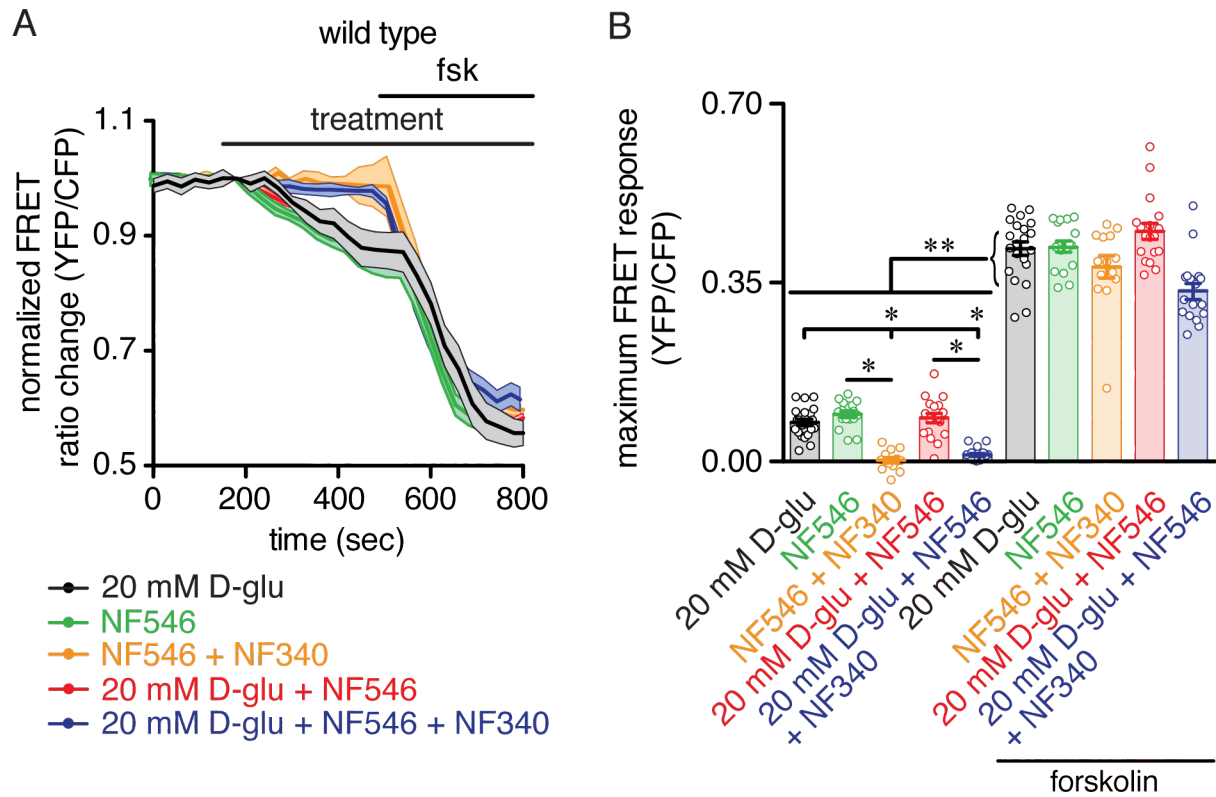

### Supplementary Figure 2: NF340 prevents glucose/NF546-induced cAMP

**synthesis. A)** Time courses of averaged ICUE3-PM traces (mean = solid line; SEM = shadow) in wild type (WT) arterial myocytes in response to 20 mM D-glucose (D-glu; black;  $n = 21$  cells/6 mice), 500 nM NF546 (green;  $n = 17$  cells/6 mice), and 20 mM D-glu + NF546 (red;  $n = 18$  cells/6 mice) and after application of 1  $\mu$ M forskolin. In a set of experiments, cells were first pretreated with the P2Y<sub>11</sub> antagonist NF340 (10  $\mu$ M) before applying 500 nM NF546 (orange;  $n = 14$  cells/6 mice) and 20 mM D-glucose + NF546 (blue;  $n = 17$  cells/6 mice). Horizontal bar indicates treatment. **B)** Plot of maximum FRET responses (YFP/CFP) for arterial myocytes in response to the indicated treatment.  $*P < 0.05$  with Kruskal-Wallis One-way ANOVA with Dunn's multiple comparisons. The single asterisks highlight significant differences between datasets in the absence of forskolin. The double asterisks indicate a statistical difference within the same experimental group in the absence and presence forskolin.  $P = 0.0003$  for 20 mM D-glu-20 mM D-glu + NF546 + NF340, and all other significant  $P$  values are  $< 0.0001$ . Data represent mean  $\pm$  SEM. Source data are provided as Source Data file.

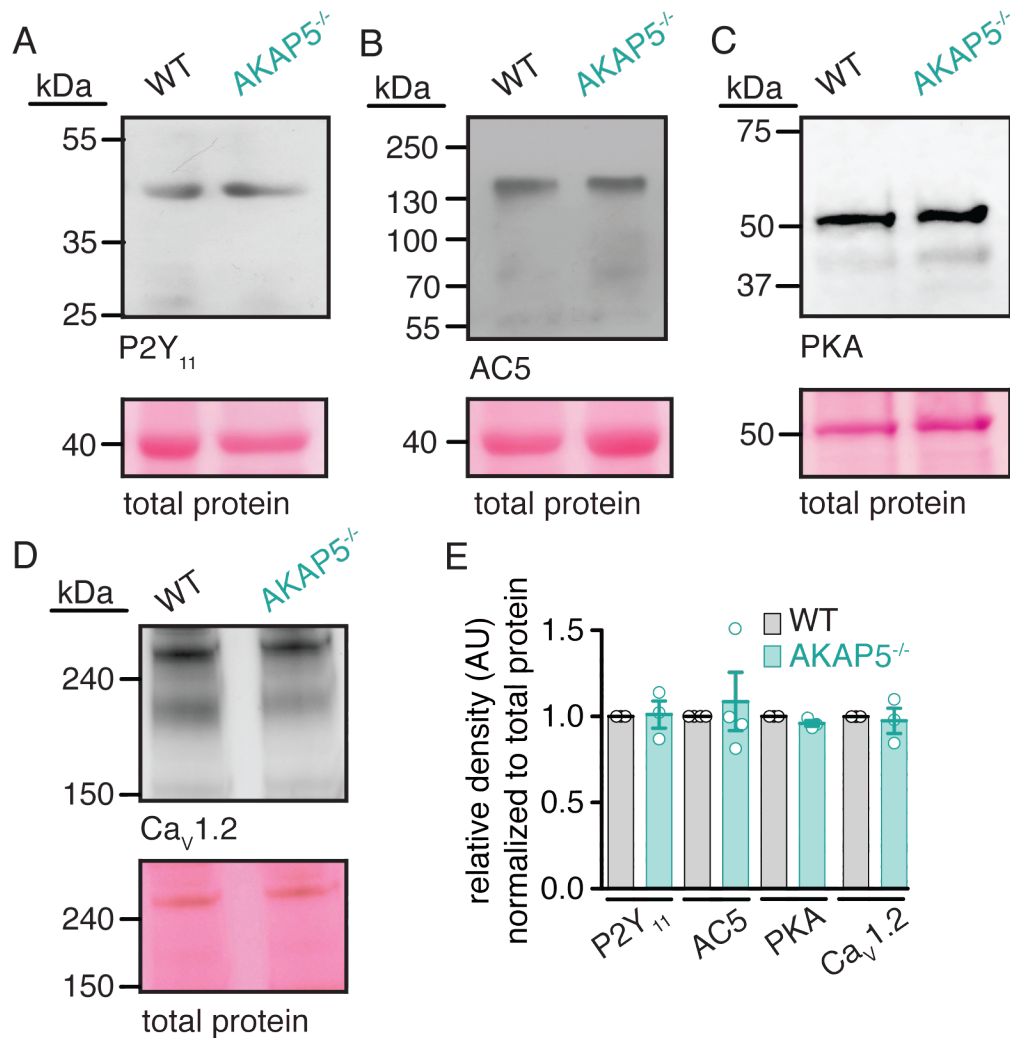

**Supplementary Figure 3: Similar P2Y<sub>11</sub>, AC5, PKA and Cav1.2 protein abundance in WT and AKAP5<sup>-/-</sup> lysates.** Representative Western blot of immunoreactive bands of expected molecular mass for **A**) P2Y<sub>11</sub> (~40 kDa), **B**) AC5 (~130 kDa), **C**) PKA (~50 kDa) and **D**) Cav1.2 (~240 kDa) in wild type (WT) and AKAP5<sup>-/-</sup> lysates. Ponceau staining was used for normalization of samples to total protein. **E**) Amalgamated densitometry data for P2Y<sub>11</sub> (n = 3 lysates/3 mice), AC5 (n = 4 lysates/4 mice), PKA (n = 3 lysates/3 mice) and Cav1.2 (n = 3 lysates/3 mice) in WT and AKAP5<sup>-/-</sup> lysates. \**P* < 0.05 with two-tailed Mann-Whitney test comparing results between WT and AKAP5<sup>-/-</sup> samples. Data represent mean ± SEM. Source data are provided as Source Data file.

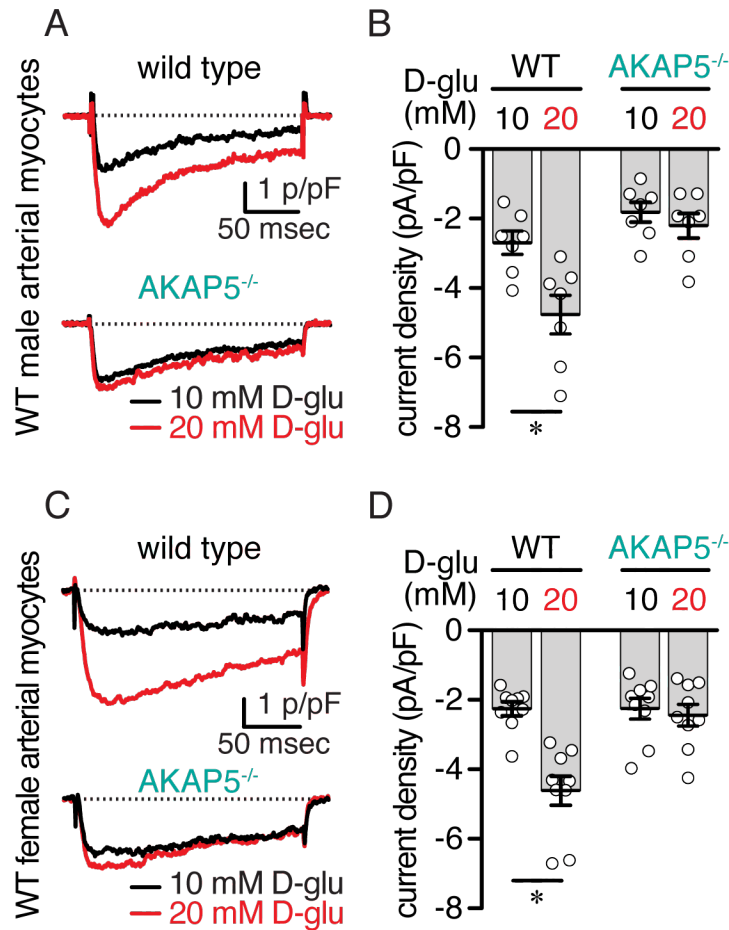

**Supplementary Figure 4. AKAP5 is required for glucose-induced L-type Ca<sup>2+</sup> channel potentiation in mouse male and female arterial myocytes.** Representative Ba<sup>2+</sup> currents (I<sub>Ba</sub>) recordings and summary I<sub>Ba</sub> data of cerebral arterial myocytes from wild type (WT) and AKAP5<sup>-/-</sup> **A, B**) male (n = 7 cells/5 WT mice and n = 7 cells/4 AKAP5<sup>-/-</sup> mice) and **C, D**) female (n = 9 cells/3 WT mice and n = 9 cells/3 AKAP5<sup>-/-</sup> mice) mice evoked by step depolarizations from -70 to +10 mV in the presence of 10 mM or 20 mM D-glucose (D-glu). Dotted lines reflect baseline. \**P* < 0.05 with two-tailed Wilcoxon test. Comparisons between the 10 mM and 20 mM D-glu condition for each dataset. *P* = 0.0156 for WT male 10 mM D-glu-20 mM D-glu and *P* = 0.0039 for WT female 10 mM D-glu-20 mM D-glu. Data represent mean ± SEM. Source data are provided as Source Data file.

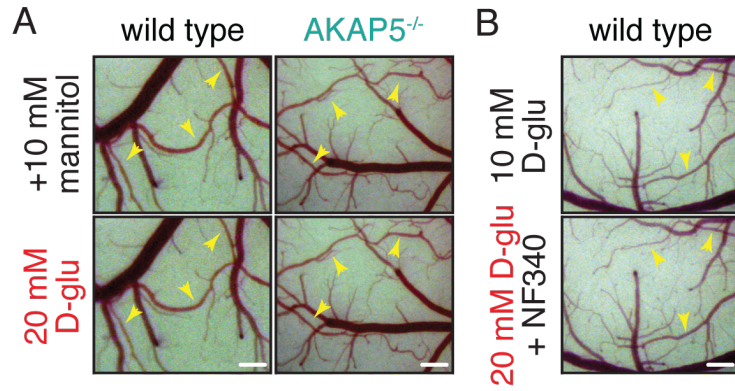

**Supplementary Figure 5. Exemplary images of cerebral arteries visualized through a cranial window in WT and AKAP5<sup>-/-</sup> mice.** Representative images of middle cerebral arteries and branches visualized through an open cranial window used to analyze diameter changes in response to **A**) 10 mM D-glucose (D-glu) + 10 mM mannitol and 20 mM D-glu in wild type (WT) and AKAP5<sup>-/-</sup> mice and **B**) 10 mM D-glu and 20 mM D-glu + NF340 in WT mice. Yellow arrows point to arteries. Scale bars = 50 pixels.

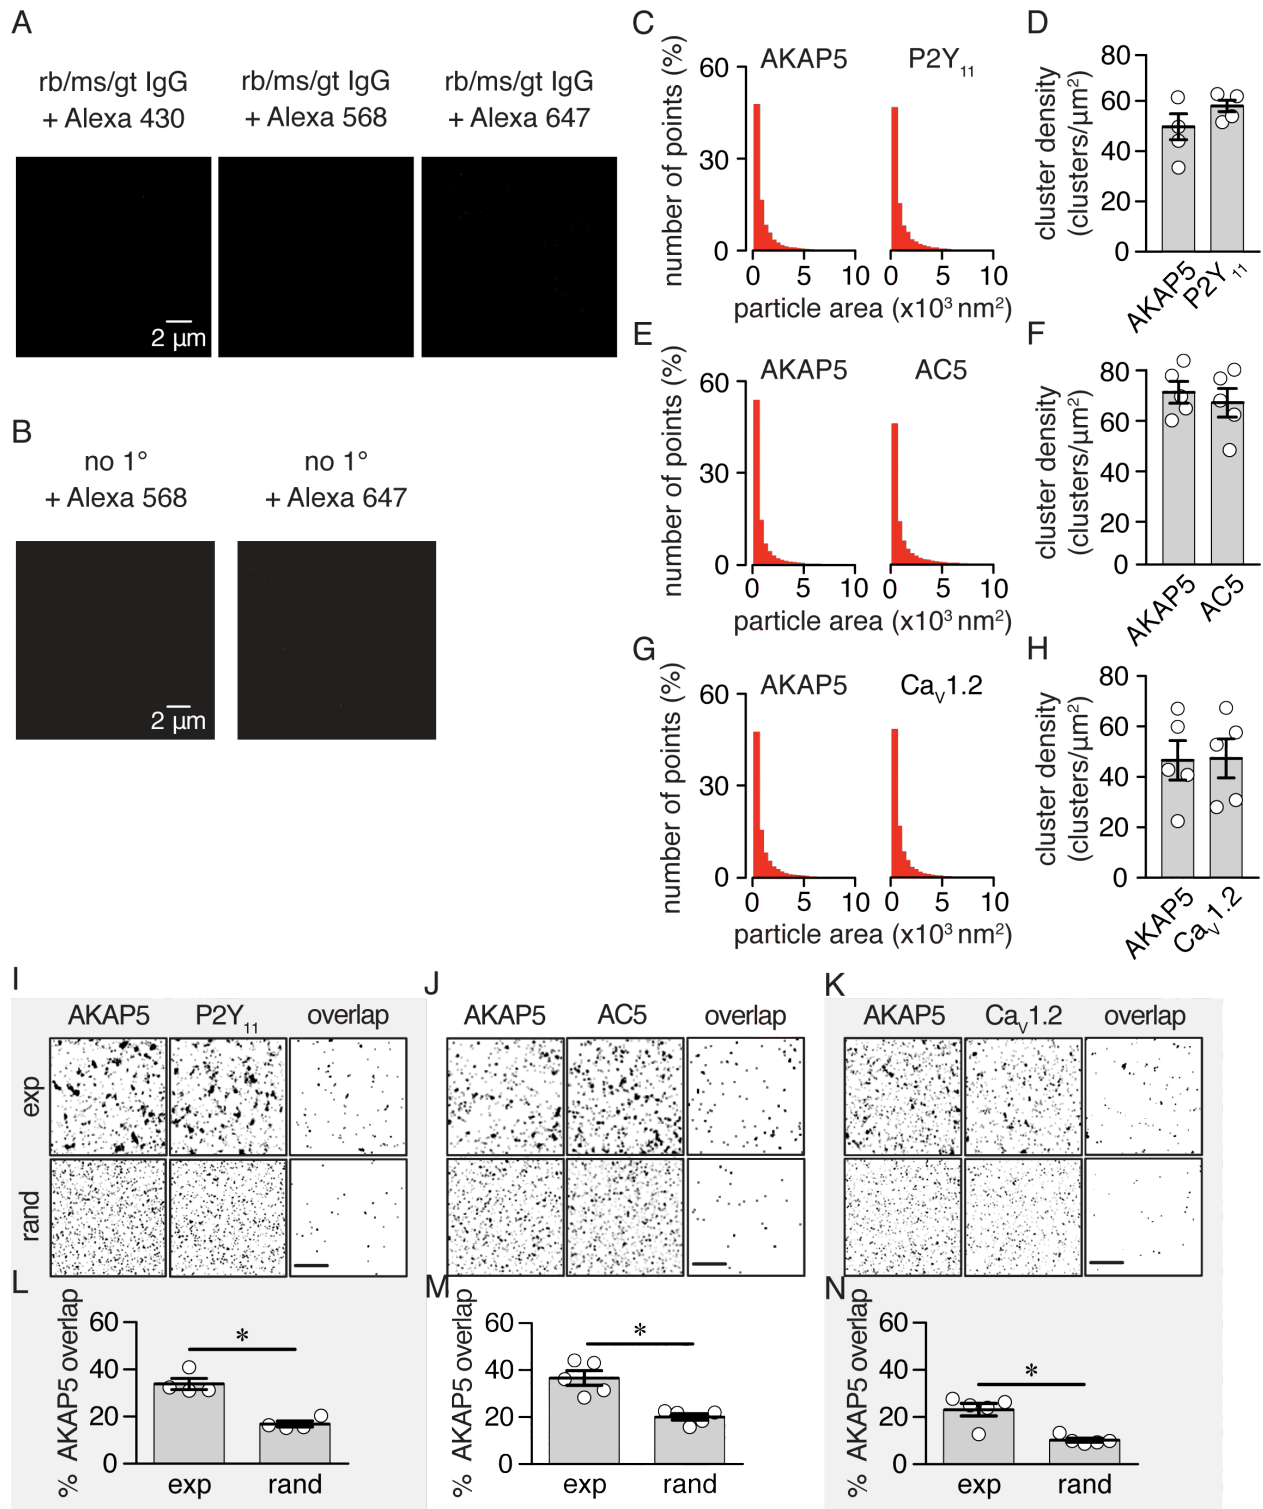

**Supplementary Figure 6: Negative controls for Airyscan and GSD super-resolution imaging, particle area and cluster density analysis, and protein overlap analysis. A) Representative Airyscan images of an arterial myocyte triple labeled with**



primary rabbit (rb), mouse (ms) and goat (gt) immunoglobulin G (IgGs) and secondary Alexa 430, Alexa 568 and Alexa 647 antibodies. Similar results were observed in 5 different cells from 2 mice. **B)** Exemplary Ground State Depletion (GSD) reconstruction maps of an arterial myocyte labeled only with secondary antibodies (no 1° + Alexa 568 and no 1° + Alexa 647). Similar results were observed in 7 different cells. Histograms of the cluster area and scatter plot of the cluster density of AKAP5 and P2Y<sub>11</sub> (**C, D**; n = 4 cells), AKAP5 and AC5 (**E, F**; n = 5 cells) and AKAP5 and Ca<sub>v</sub>1.2 (**G, H**; n = 5 cells). Average cluster area for each dataset are **C)** AKAP5 = 2408 ± 46, P2Y<sub>11</sub> = 2697 ± 58, **E)** AKAP5 = 2721 ± 252, AC5 = 3514 ± 304 and **G)** AKAP5 = 2752 ± 52, P2Y<sub>11</sub> = 2093 ± 31. Representative experimental (exp; *top*) and randomized (rand; *bottom*) images of reconstruction maps for **I)** AKAP5-P2Y<sub>11</sub> (n = 4 cells), **J)** AKAP5-AC5 (n = 5 cells) and **K)** AKAP5-Ca<sub>v</sub>1.2 (n = 5 cells). Scatter plots of percentage of overlap of AKAP5 with **L)** P2Y<sub>11</sub>, **M)** AC5 and **N)** Ca<sub>v</sub>1.2 for experimental and randomized simulation images. \**P* < 0.05 with two-tailed Mann-Whitney test. *P* = 0.0286 for AKAP5-P2Y<sub>11</sub>, *P* = 0.0079 for AKAP5-AC5 and *P* = 0.0159 for AKAP5-Ca<sub>v</sub>1.2. Data represent mean ± SEM. Source data are provided as Source Data file.

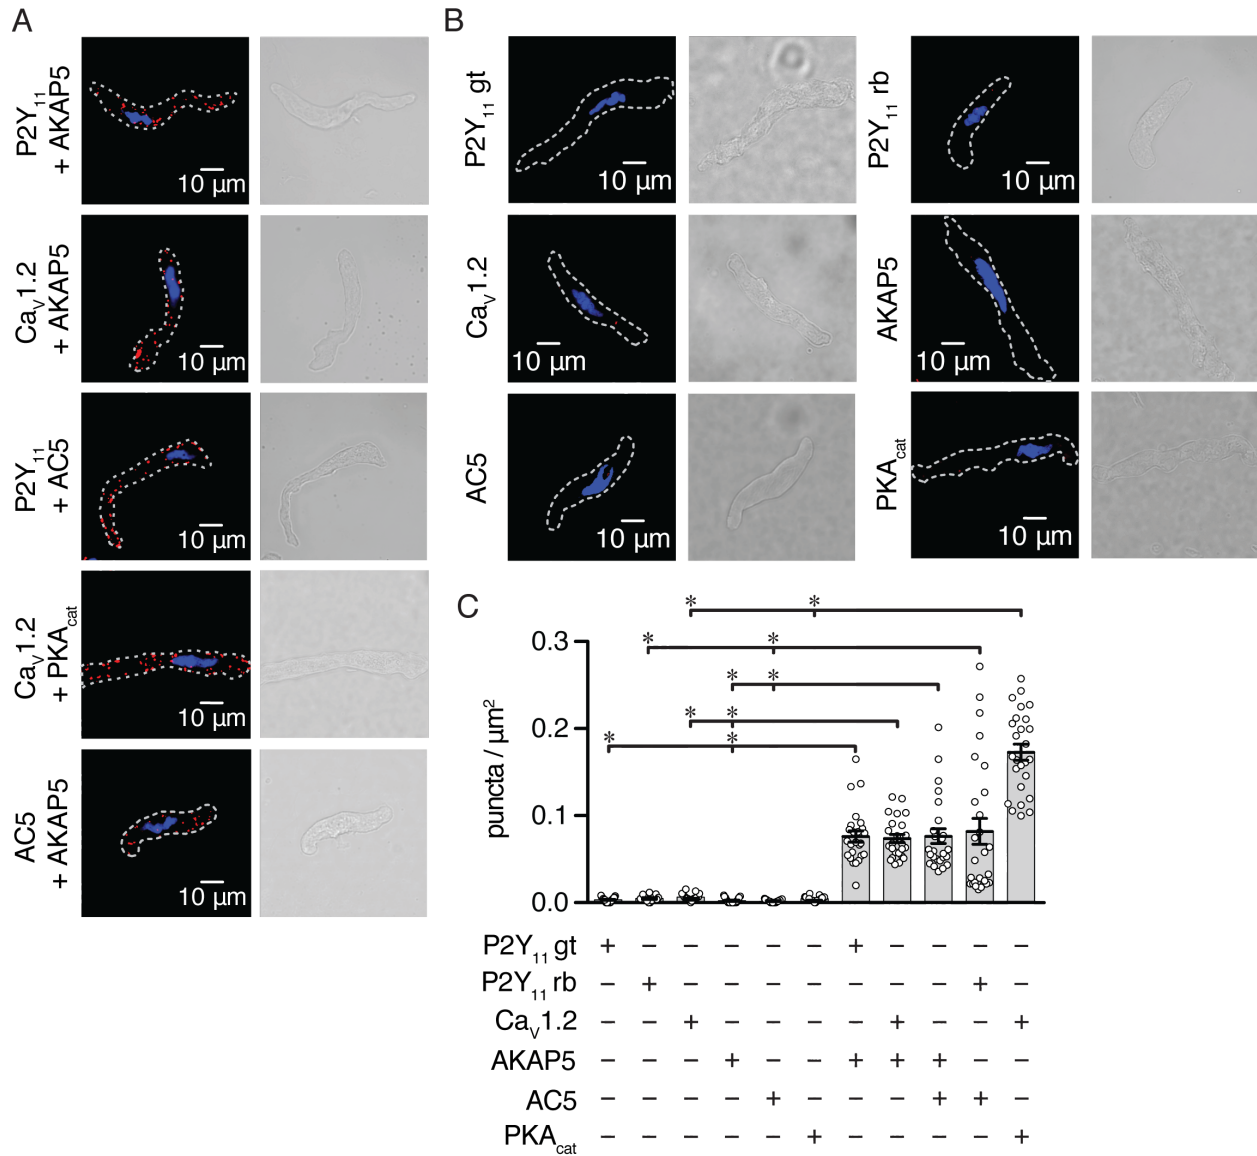

**Supplementary Figure 7. An AKAP5/P2Y<sub>11</sub>/AC5/PKA/Cav1.2 nanocomplex in human arterial myocytes. A)** Representative merged fluorescence proximity ligation assay (PLA; red)/nucleus (blue; left panels) and differential interference contrast (right panels) images of human arterial myocytes co-labeled for **A)** P2Y<sub>11</sub> + AKAP5, Cav1.2 + AKAP5, P2Y<sub>11</sub> + AC5, Cav1.2 + PKA<sub>cat</sub> and AC5 + AKAP5, as well as representative images of cells labeled with only one 1° antibody for **B)** P2Y<sub>11</sub> (goat = gt), P2Y<sub>11</sub> (rabbit = rb), Cav1.2, AKAP5, AC5 and PKA<sub>cat</sub>. **C)** Quantification of PLA fluorescent puncta per cell area (puncta/ $\mu\text{m}^2$ ) for human arterial myocytes labeled for P2Y<sub>11</sub> gt (n = 27 cells/3 humans), P2Y<sub>11</sub> rb (n = 17 cells/3 humans), Cav1.2 (n = 19 cells/3 humans), AKAP5 (n

= 31 cells/3 humans), AC5 (n = 33 cells/3 humans), PKA<sub>cat</sub> (n = 21 cells/3 humans), P2Y<sub>11</sub> + AKAP5 (n = 25 cells/3 humans), Ca<sub>v</sub>1.2 + AKAP5 (n = 24 cells/4 humans), AC5 + AKAP5 (n = 25 cells/3 humans), P2Y<sub>11</sub> + AC5 (n = 27 cells/3 humans), and Ca<sub>v</sub>1.2 + PKA<sub>cat</sub> (n = 26 cells/3 humans). \**P* < 0.05 with Kruskal-Wallis One-way ANOVA with specific Dunn's multiple comparisons as displayed. All significant *P* values are < 0.0001. Data represent mean ± SEM. Source data are provided as Source Data file.

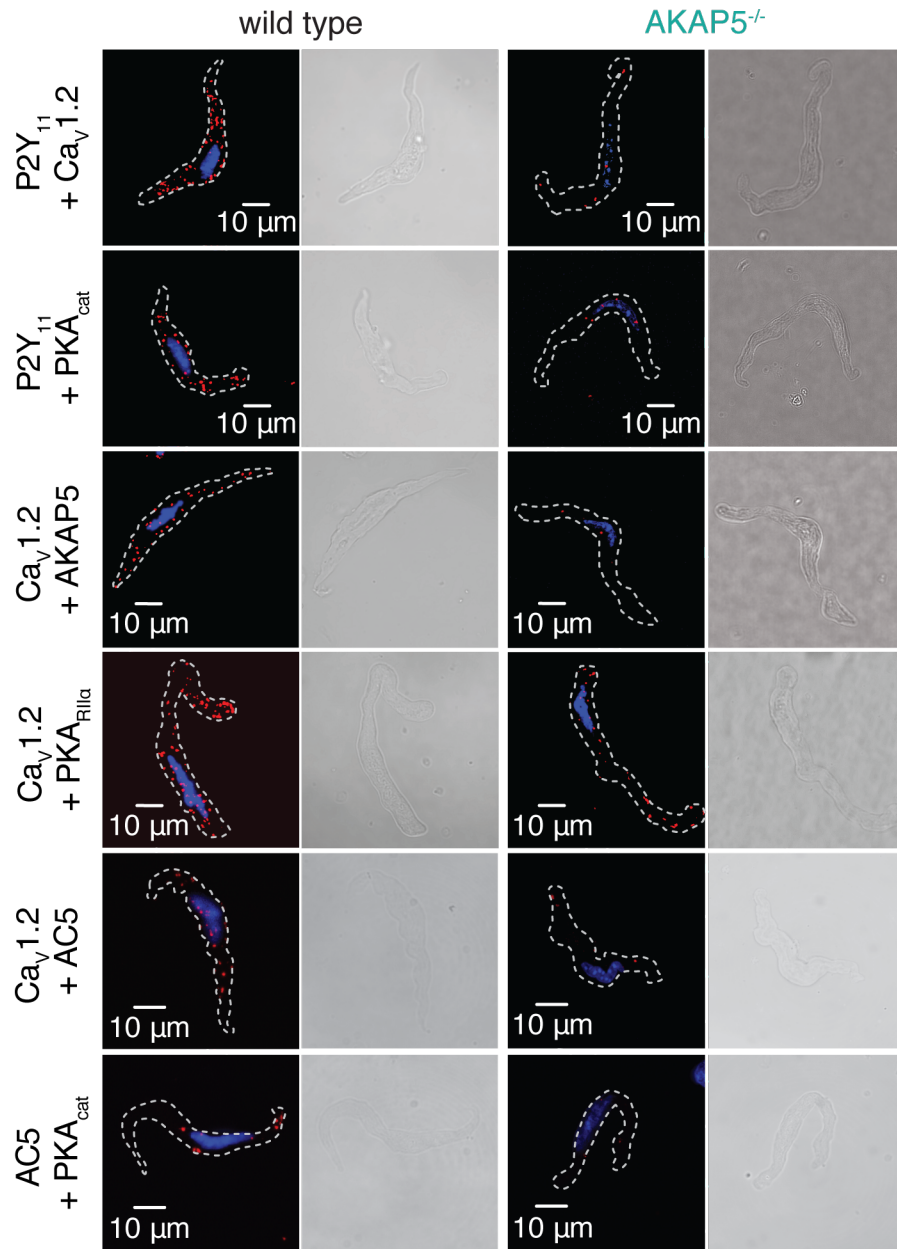

**Supplementary Figure 8. PLA images for WT and *AKAP5*<sup>-/-</sup> arterial myocytes.**

Exemplary merged fluorescence proximity ligation assay (PLA; red)/nucleus (blue; left panels) and differential interference contrast (right panels) images of wild type (WT) and *AKAP5*<sup>-/-</sup> cerebral arterial myocytes co-labeled for P2Y<sub>11</sub> + Ca<sub>v</sub>1.2, P2Y<sub>11</sub> + PKA<sub>cat</sub>, Ca<sub>v</sub>1.2 + AKAP5, Ca<sub>v</sub>1.2 + PKA<sub>R11α</sub>, Ca<sub>v</sub>1.2 + AC5 and AC5 + PKA<sub>cat</sub>.

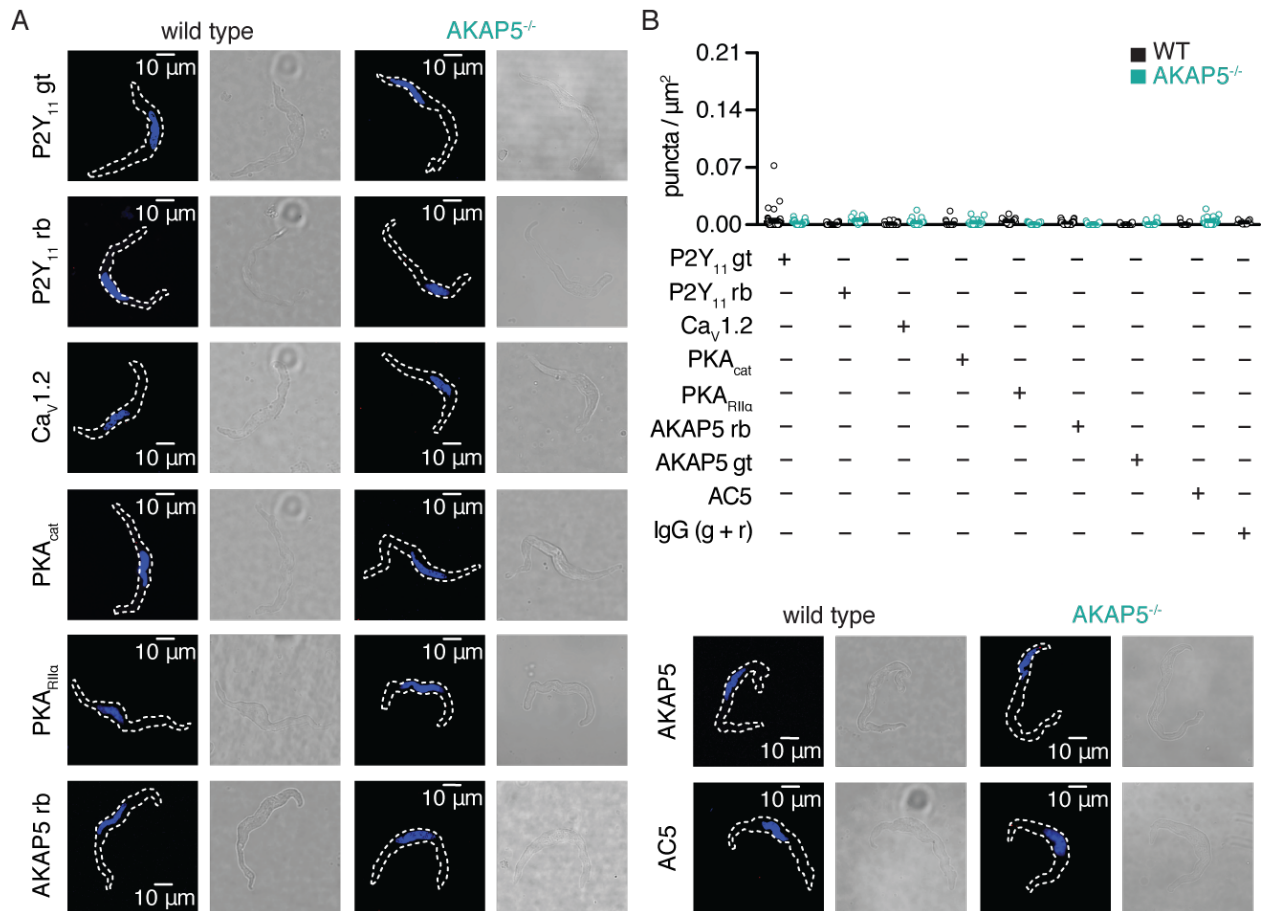

**Supplementary Figure 9. PLA images and quantification of negative control experiments for WT and AKAP5<sup>-/-</sup> arterial myocytes. A)**

Representative merged fluorescence proximity ligation assay (PLA; red)/nucleus (blue; left panels) and differential interference contrast (right panels) images and **B)** quantification of PLA fluorescent puncta per cell area (puncta/ $\mu\text{m}^2$ ) of wild type (WT) and AKAP5<sup>-/-</sup> arterial myocytes labeled with only one 1° antibody for P2Y<sub>11</sub> goat (gt; n = 43 cells/3 WT mice; n = 37 cells/3 AKAP5<sup>-/-</sup> mice), P2Y<sub>11</sub> rabbit (rb; n = 20 cells/3 WT mice; n = 17 cells/3 AKAP5<sup>-/-</sup> mice), Cav1.2 (n = 43 cells/3 WT mice; n = 34 cells/3 AKAP5<sup>-/-</sup> mice), PKA<sub>cat</sub> (n = 20 cells/3 WT mice; n = 18 cells/3 AKAP5<sup>-/-</sup> mice), PKA<sub>R11α</sub> (n = 16 cells/3 WT mice; n = 15 cells/3 AKAP5<sup>-/-</sup> mice), AKAP5 rabbit (rb; n = 41 cells/3 WT mice; n = 15 cells/3 AKAP5<sup>-/-</sup> mice), AKAP5 goat (gt; n = 20 cells/3 WT mice; n = 18 cells/3 AKAP5<sup>-/-</sup> mice) and AC5 (n = 21 cells/3 WT mice; n = 26 cells/3 AKAP5<sup>-/-</sup> mice). For some experiments, WT arterial myocytes were labeled with primary goat and rabbit immunoglobulin G

(IgGs) followed by the PLUS and MINUS probes of the PLA assay (IgG (g + r) dataset; n = 9 cells/2 mice) as negative control experiments. Data represent mean  $\pm$  SEM. Source data are provided as Source Data file.

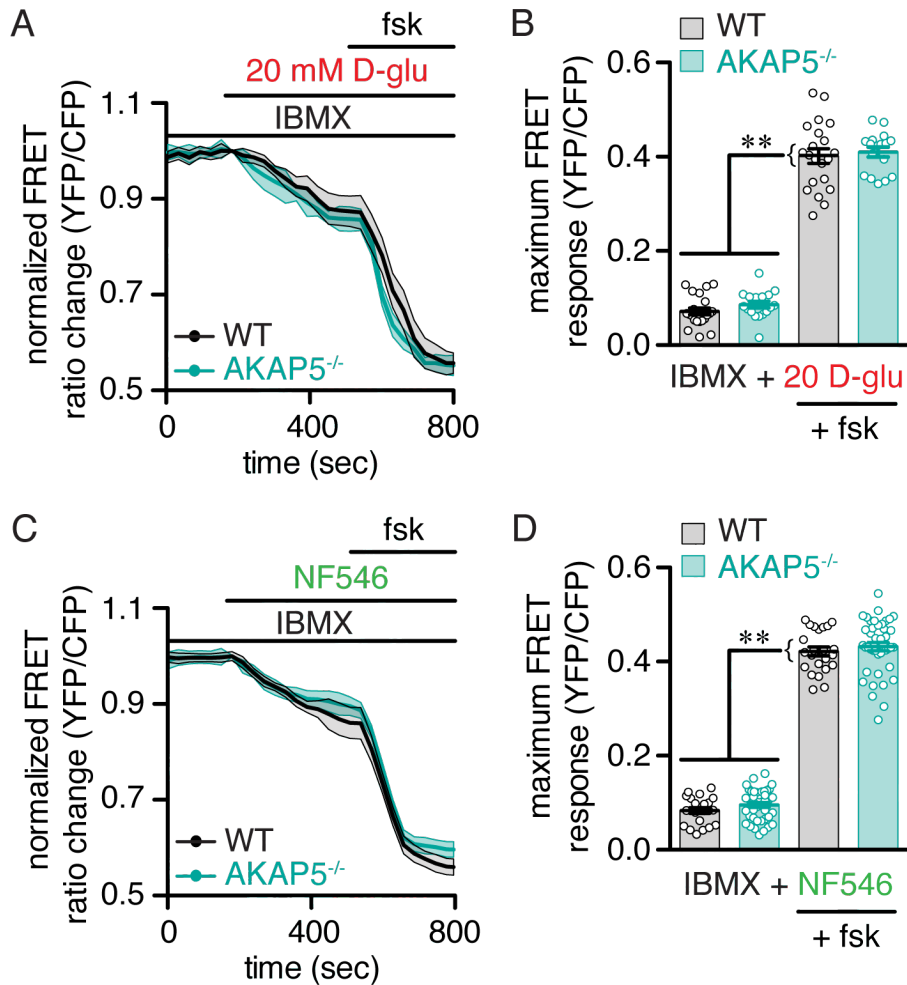

**Supplementary Figure 10. PDE inhibition rescues glucose/NF546-induced cAMP synthesis in arterial myocytes.** Time courses of the average ICUE3-PM traces (mean = solid line; SEM = shadow) and summary data of wild type (WT) and AKAP5<sup>-/-</sup> arterial myocytes pretreated with the broad phosphodiesterase (PDE) inhibitor 3-isobutyl-1-methylxanthine (IBMX) in response to **A, B**) 20 mM D-glucose (D-glu; n = 21 cells/3 WT mice and n = 17 arteries/3 AKAP5<sup>-/-</sup> mice) and **C, D**) NF546 (n = 23 cells/3 WT mice and n = 40 arteries/3 AKAP5<sup>-/-</sup> mice) and after application of forskolin. \**P* < 0.05 with two-tailed Mann-Whitney test. The single asterisks highlight significant differences between datasets in the absence of forskolin. The double asterisks indicate a statistical difference within the same experimental group in the absence and presence forskolin. All significant *P* values are < 0.0001. Data represent mean ± SEM. Source data are provided as Source Data file.

**Supplementary Table 1: Human nondiabetic patients undergoing surgical sleeve gastrectomy**

| <b>age (years)</b> | <b>gender</b> |
|--------------------|---------------|
| 41.5 ± 5.0         | 5 F / 3 M     |

Values are mean ± SEM. n = 8 samples obtained from 5 female and 3 male donors.

Source data are provided as Source Data file.



**Supplementary Table 2: Percent treatment-induced changes in tone for experiments in Figure 3A and Figure 3D.**

|                                                     | WT (3A)     | AKAP5 <sup>-/-</sup> (3A) | WT (3D)     | AKAP5 <sup>-/-</sup> (3D) | AC5 <sup>-/-</sup> (3D) |
|-----------------------------------------------------|-------------|---------------------------|-------------|---------------------------|-------------------------|
| peak 60 mM K <sup>+</sup> constriction (%)          | 67.4 ± 3.0  | 58.4 ± 8.0                | 62.2 ± 3.7  | 66.0 ± 2.9                | 69.9 ± 3.5              |
| arterial tone (%) in 10 mM D-glu                    | 16.1 ± 2.0  | 17.0 ± 1.7                | 14.6 ± 1.5  | 21.8 ± 3.4                | 15.9 ± 2.5              |
| arterial tone (%) in 20 mM D-glu (3A) or NF546 (3D) | 26.1 ± 2.7* | 19.5 ± 1.3                | 24.3 ± 3.1* | 21.7 ± 3.3                | 15.6 ± 2.6              |
| Δ arterial tone (%)                                 | 10.0 ± 1.0* | 2.4 ± 1.1                 | 9.8 ± 2.2*  | -0.1 ± 0.5                | -0.2 ± 0.2              |

Values are mean ± SEM. For Figure 3A, n = 9 arteries from 5 WT mice and 7 arteries from 6 AKAP5<sup>-/-</sup> mice. For Figure 3D, n = 6 arteries from 4 WT mice, 8 arteries from 6 AKAP5<sup>-/-</sup> mice and 6 arteries from 4 AC5<sup>-/-</sup> mice. \**P* < 0.05 with two-tailed Wilcoxon test for data associated with Figure 3A and Kruskal-Wallis One-way ANOVA with Dunn's multiple comparisons for data associated with Figure 3D. *P* = 0.0039 for WT 10 mM D-glu-20 mM D-glu comparison in Figure 3Aii, *P* = 0.0012 for WT-AKAP5<sup>-/-</sup> comparison in Figure 3Aiii, *P* = 0.0313 for WT 10 mM D-glu-NF546 comparison in Figure 3Dii, and *P* = 0.0036 for WT-AKAP5<sup>-/-</sup> and *P* = 0.0040 for WT-AC5<sup>-/-</sup> for comparison in Figure 3Diii. Source data are provided as Source Data file.

**Supplementary Table 3: Percent treatment-induced changes in Figure 4.**

| <b>Percent treatment-induced changes in tone in Figure 4A and 4C</b> |              |                            |
|----------------------------------------------------------------------|--------------|----------------------------|
|                                                                      | <b>WT</b>    | <b>AKAP5<sup>-/-</sup></b> |
| <b>arterial tone (%) in 10 mM D-glu</b>                              | 24.5 ± 2.8   | 22.5 ± 2.7                 |
| <b>arterial tone (%) in 10 mM D-glu + 10 mM mannitol</b>             | 24.4 ± 3.1   | 23.5 ± 3.1                 |
| <b>arterial tone (%) in 20 mM D-glu</b>                              | 45.1 ± 2.6*  | 26.4 ± 2.8                 |
| <b>arterial tone (%) in 20 mM D-glu + NF546</b>                      | 40.7 ± 1.8*  | 22.9 ± 2.2                 |
| <b>arterial tone (%) in 10 mM D-glu</b>                              | 23.1 ± 2.6   | -                          |
| <b>arterial tone (%) in NF340 + 10 mM D-glu + 10 mM mannitol</b>     | 24.1 ± 3.0   | -                          |
| <b>arterial tone (%) in NF340 + 20 mM D-glu</b>                      | 21.8 ± 2.1   | -                          |
| <b>arterial tone (%) in NF340 + 20 mM D-glu + NF546</b>              | 24.6 ± 2.3   | -                          |
| <b>Percent treatment-induced changes in blood flow in Figure 4B</b>  |              |                            |
| <b>Δ blood flow in 10 mM D-glu + 10 mM mannitol</b>                  | 0.91 ± 0.01  | 1.01 ± 0.01                |
| <b>Δ in 20 mM D-glu</b>                                              | 0.80 ± 0.02* | 0.97 ± 0.01                |
| <b>Δ in 20 mM D-glu + NF546</b>                                      | 0.77 ± 0.03* | 1.00 ± 0.01                |

Values are mean ± SEM. For Figure 4A, n = 18 arteries from 3 WT mice and n = 21 arteries from 3 AKAP5<sup>-/-</sup> mice. For Figure 4B, n = 18 arteries from 5 WT mice and 12 arteries from 3 AKAP5<sup>-/-</sup> mice. For Figure 4C, n = 23 arteries from 3 WT mice. \**P* < 0.05 with Friedman One-way ANOVA with Dunn's multiple comparisons. *P* < 0.0001 for WT 10 mM D-glu-20 mM D-glu and *P* = 0.0004 for WT 10 mM D-glu-20 mM D-glu + NF546 for comparisons in Figure 4A, and *P* = 0.0007 for WT mannitol-20 mM D-glu and *P* < 0.0001 for WT mannitol-20 mM D-glu + NF546 for comparisons in Figure 4B. Source data are provided as Source Data file.

**Supplementary Table 4: Percent treatment-induced changes in tone for experiments in Figure 7B.**

|                                                        | <b>WT</b>   | <b>AKAP5<sup>-/-</sup></b> |
|--------------------------------------------------------|-------------|----------------------------|
| <b>peak 60 mM K<sup>+</sup> constriction (%)</b>       | 66.7 ± 3.0  | 59.9 ± 3.7                 |
| <b>arterial tone (%) in IBMX + 10 mM D-glu</b>         | 15.7 ± 3.1  | 15.3 ± 2.1                 |
| <b>arterial tone (%) in IBMX + 20 mM D-glu</b>         | 26.5 ± 2.9* | 15.7 ± 2.3                 |
| <b>arterial tone (%) in IBMX + 20 mM D-glu + NF546</b> | 26.5 ± 2.9* | 15.6 ± 2.4                 |

Values are mean ± SEM. For Figure 7B, n = 6 arteries from 4 WT mice and 6 arteries from 3 AKAP5<sup>-/-</sup> mice. \**P* < 0.05 with two-tailed Mann-Whitney test for 60 mM K<sup>+</sup> response and Friedman One-way ANOVA with Dunn's multiple comparisons for multiple comparisons. *P* = 0.0281 for WT 10 mM D-glu + IBMX-20 mM D-glu + IBMX and *P* = 0.0281 for WT 10 mM D-glu + IBMX-20 mM D-glu + NF546 + IBMX for comparisons in Figure 7B. Source data are provided as Source Data file.

**Supplementary Table 5: Key reagents/resources used in the study.**

| Reagent type (species) or resource       | Designation                                | Source or reference      | Identifiers                 | Additional Information                                                                                                                                                              |
|------------------------------------------|--------------------------------------------|--------------------------|-----------------------------|-------------------------------------------------------------------------------------------------------------------------------------------------------------------------------------|
| strain ( <i>Mus musculus</i> ), C57BL/6J | wild-type                                  | Jackson Laboratories     | stock # 000664              |                                                                                                                                                                                     |
| strain ( <i>Mus musculus</i> )           | AKAP5 <sup>-/-</sup>                       | 1,2                      |                             | Backcrossed for 10 generations into the C57BL/6J background                                                                                                                         |
| strain ( <i>Mus musculus</i> )           | AC5 <sup>-/-</sup>                         | 3                        |                             | Backcrossed for 10 generations into the C57BL/6J background                                                                                                                         |
| antibody                                 | FP1 (Cav1.2; custom rabbit)                | 4                        |                             | 1:100 dilution. Used for mouse datasets. Validated in Davare et al, JBC doi: 10.1074/jbc.M005462200 and Buonarati et al F1000Res doi: 10.12688/f1000research.11808.2                |
| antibody                                 | anti-Cav1.2 (mouse monoclonal)             | Neuromab                 | clone N263/31               | 1:200 dilution. Used for human datasets. For validation see <a href="http://neuromab.ucdavis.edu/dataset/heet/N263_31.pdf">http://neuromab.ucdavis.edu/dataset/heet/N263_31.pdf</a> |
| antibody                                 | anti-AC5 (goat polyclonal)                 | Santa Cruz Biotechnology | sc74301<br>RRID: AB_2289217 | 1:50-1:1000 dilutions. Validated in Syed et al, JCI doi: 10.1172/JCI124705                                                                                                          |
| antibody                                 | anti-P2Y <sub>11</sub> (rabbit polyclonal) | Abcam                    | ab180739                    | 1:100-1:200 dilutions. Validated in Prada et al. eLife doi: 10.7554/eLife.42214                                                                                                     |
| antibody                                 | anti-P2Y <sub>11</sub> (goat polyclonal)   | Santa Cruz Biotechnology | sc-69588; clone C-18        | 1:100-1:200 dilutions. Prada et al. eLife doi:                                                                                                                                      |

|          |                                                           |                                    |                                  |                                                                                                                                                                                                                                                                                                                                                                                                                     |
|----------|-----------------------------------------------------------|------------------------------------|----------------------------------|---------------------------------------------------------------------------------------------------------------------------------------------------------------------------------------------------------------------------------------------------------------------------------------------------------------------------------------------------------------------------------------------------------------------|
|          |                                                           |                                    | RRID:<br>AB_21559                | 10.7554/eLife.422<br>14                                                                                                                                                                                                                                                                                                                                                                                             |
| antibody | anti-AKAP79<br>(rabbit<br>polyclonal)                     | Millipore                          | ABS102                           | 1:200 dilution. For<br>validation see<br><a href="https://www.emdmillipore.com/US/en/product/Anti-AKAP-79-Antibody,MM_NF-ABS102?ReferrerURL=https%3A%2F%2Fwww.google.com%2F">https://www.emdmillipore.com/US/en/product/Anti-AKAP-79-Antibody,MM_NF-ABS102?ReferrerURL=https%3A%2F%2Fwww.google.com%2F</a>                                                                                                          |
| antibody | anti-AKAP150<br>(rabbit<br>polyclonal)                    | Millipore                          | 07-210                           | 1:200 dilution.<br>Validated in<br>Nystoriak et al,<br>Science Signaling<br>doi:<br>10.1126/scisignal.<br>aaf9647                                                                                                                                                                                                                                                                                                   |
| antibody | anti-AKAP150<br>(goat<br>polyclonal)                      | Santa Cruz<br>Biotechnology        | clone C-20                       | 1:200 dilution. For<br>validation see<br><a href="https://www.scbt.com/p/akap-150-antibody-c-20?productCanUrl=akap-150-antibody-c-20&amp;_requestid=2603832;">https://www.scbt.com/p/akap-150-antibody-c-20?productCanUrl=akap-150-antibody-c-20&amp;_requestid=2603832;</a> ;<br>additional<br>information in<br><a href="https://datasheets.scbt.com/sc-377055.pdf">https://datasheets.scbt.com/sc-377055.pdf</a> |
| antibody | anti-PKA <sub>R11α</sub><br>(mouse<br>monoclonal)         | BD<br>Transduction<br>Laboratories | 612242                           | 1:50 dilution.<br>Validated in<br>Prada et al. eLife<br>doi:<br>10.7554/eLife.422<br>14                                                                                                                                                                                                                                                                                                                             |
| antibody | anti-PKA <sub>cat</sub> α,<br>β, γ (rabbit<br>polyclonal) | Santa Cruz<br>Biotechnology        | sc-28892;<br>clone H-95          | 1:200 dilution. For<br>validation see<br><a href="http://datasheets.scbt.com/sc-28892.pdf">http://datasheets.scbt.com/sc-28892.pdf</a>                                                                                                                                                                                                                                                                              |
| antibody | goat anti-<br>rabbit IgG<br>(H+L)-                        | Bio-Rad                            | 170-6515<br>RRID:<br>AB_11125142 | 1:10000 dilution.<br>For validation see<br><a href="https://www.bio-">https://www.bio-</a>                                                                                                                                                                                                                                                                                                                          |

|          |                                              |                  |                               |                                                                                                                                                                                                                                                                                                                                                                                                  |
|----------|----------------------------------------------|------------------|-------------------------------|--------------------------------------------------------------------------------------------------------------------------------------------------------------------------------------------------------------------------------------------------------------------------------------------------------------------------------------------------------------------------------------------------|
|          | horseradish peroxidase conjugate             |                  |                               | rad.com/en-us/sku/1706515-goat-anti-rabbit-igg-h-l-hrp-conjugate?ID=1706515#                                                                                                                                                                                                                                                                                                                     |
| antibody | IRDye 800CW goat anti-mouse/rabbit           | Abcam            | ab216772/<br>ab216773         | 1:5000. For validation see <a href="https://www.abcam.com/goat-mouse-igg-hl-irdyereg-800cw-preadsorbed-ab216772.html">https://www.abcam.com/goat-mouse-igg-hl-irdyereg-800cw-preadsorbed-ab216772.html</a> and <a href="https://www.abcam.com/goat-rabbit-igg-hl-irdyereg-800cw-preadsorbed-ab216773.html">https://www.abcam.com/goat-rabbit-igg-hl-irdyereg-800cw-preadsorbed-ab216773.html</a> |
| antibody | Alexa Fluor 430-conjugated goat anti-rabbit  | Molecular Probes | A11064<br>RRID:<br>AB_2534111 | 5 mg/mL dilution. For validation see <a href="https://www.thermofisher.com/antibody/product/Goat-anti-Rabbit-IgG-H-L-Cross-Adsorbed-Secondary-Antibody-Polyclonal/A-11064">https://www.thermofisher.com/antibody/product/Goat-anti-Rabbit-IgG-H-L-Cross-Adsorbed-Secondary-Antibody-Polyclonal/A-11064</a>                                                                                       |
| antibody | Alexa Fluor 568-conjugated donkey anti-mouse | Molecular Probes | A10037<br>RRID:<br>AB_2534013 | 5 µg/mL dilution. For validation see Prada et al. eLife doi: 10.7554/eLife.42214; Nystoriak et al, Science Signaling doi: 10.1126/scisignal.aaf9647; Syed et al, JCI doi: 10.1172/JCI124705; <a href="https://www.thermofisher.com/antibody/product/Donkey-anti-Mouse-IgG-H-L-Highly-">https://www.thermofisher.com/antibody/product/Donkey-anti-Mouse-IgG-H-L-Highly-</a>                       |

|          |                                             |                  |                        |                                                                                                                                                                                                                                                                                                                                                                                                                                                                    |
|----------|---------------------------------------------|------------------|------------------------|--------------------------------------------------------------------------------------------------------------------------------------------------------------------------------------------------------------------------------------------------------------------------------------------------------------------------------------------------------------------------------------------------------------------------------------------------------------------|
|          |                                             |                  |                        | Cross-Adsorbed-Secondary-Antibody-Polyclonal/A10037                                                                                                                                                                                                                                                                                                                                                                                                                |
| antibody | Alexa Fluor 647-conjugated donkey anti-goat | Molecular Probes | A21447<br>RRID: 141844 | 5 µg/mL dilution. For validation see Prada et al. eLife doi: 10.7554/eLife.42214; Nystoriak et al, Science Signaling doi: 10.1126/scisignal.aaf9647; Syed et al, JCI doi: 10.1172/JCI124705; <a href="https://www.thermofisher.com/antibody/product/Donkey-anti-Goat-IgG-H-L-Cross-Adsorbed-Secondary-Antibody-Polyclonal/A-21447">https://www.thermofisher.com/antibody/product/Donkey-anti-Goat-IgG-H-L-Cross-Adsorbed-Secondary-Antibody-Polyclonal/A-21447</a> |
| antibody | normal mouse IgG                            | Millipore        | NI03                   | 10 µg/mL dilution. For validation see <a href="https://www.emdmillipore.com/US/en/product/Norm-I-Mouse-IgG,EMD_BIO-NI03">https://www.emdmillipore.com/US/en/product/Norm-I-Mouse-IgG,EMD_BIO-NI03</a>                                                                                                                                                                                                                                                              |
| antibody | normal rabbit IgG                           | Cell Signaling   | 2729S                  | 10 µg/mL dilution. For validation see <a href="https://www.cellsignal.com/products/primary-antibodies/normal-rabbit-igg/2729">https://www.cellsignal.com/products/primary-antibodies/normal-rabbit-igg/2729</a>                                                                                                                                                                                                                                                    |
| antibody | normal goat IgG                             | Millipore        | NI02                   | 10 µg/mL dilution. For validation see <a href="https://www.emdmillipore.com/US/en/product/Norma-I-Goat-">https://www.emdmillipore.com/US/en/product/Norma-I-Goat-</a>                                                                                                                                                                                                                                                                                              |

|                            |                                 |                             |                                |                                                                                                                                                                                                                                                                                                                                                            |
|----------------------------|---------------------------------|-----------------------------|--------------------------------|------------------------------------------------------------------------------------------------------------------------------------------------------------------------------------------------------------------------------------------------------------------------------------------------------------------------------------------------------------|
|                            |                                 |                             |                                | IgG,EMD_BIO-<br>NI02                                                                                                                                                                                                                                                                                                                                       |
| antibody                   | CD31 - biotin                   | BD Bioscience               | 558737<br>RRID:<br>AB_397096   | 5 mg/mL dilution.<br>For validation see<br><a href="https://www.bdbiosciences.com/eu/applications/research/stem-cell-research/cancer-research/mouse/biotin-rat-anti-mouse-cd31-390/p/558737">https://www.bdbiosciences.com/eu/applications/research/stem-cell-research/cancer-research/mouse/biotin-rat-anti-mouse-cd31-390/p/558737</a>                   |
| antibody                   | CD45 - biotin                   | BD Bioscience               | 553077<br>RRID:<br>AB_394607   | 2 µg/mL dilution.<br>For validation see<br><a href="https://www.bdbiosciences.com/eu/applications/research/stem-cell-research/cancer-research/mouse/biotin-rat-anti-mouse-cd45-30-f11/p/553077">https://www.bdbiosciences.com/eu/applications/research/stem-cell-research/cancer-research/mouse/biotin-rat-anti-mouse-cd45-30-f11/p/553077</a>             |
| antibody                   | lineage<br>antibody<br>cocktail | BD Bioscience               | 559971<br>RRID:<br>AB_10053179 | 2 µg/mL dilution.<br>For validation see<br><a href="https://www.bdbiosciences.com/eu/applications/research/stem-cell-research/stem-cell-kits-and-cocktails/mouse/biotin-mouse-lineage-panel/p/559971">https://www.bdbiosciences.com/eu/applications/research/stem-cell-research/stem-cell-kits-and-cocktails/mouse/biotin-mouse-lineage-panel/p/559971</a> |
| FRET biosensor             | ICUE3-PM/<br>ICUE3-NLS          | 5,6                         |                                | viruses/DNA<br>constructs                                                                                                                                                                                                                                                                                                                                  |
| chemical compound,<br>drug | IBMX                            | Sigma                       | I5879                          |                                                                                                                                                                                                                                                                                                                                                            |
| chemical compound,<br>drug | mannitol                        | Fisher Scientific           | BP686                          |                                                                                                                                                                                                                                                                                                                                                            |
| chemical compound,<br>drug | NF340                           | Santa Cruz<br>Biotechnology | sc-361274                      |                                                                                                                                                                                                                                                                                                                                                            |
| chemical compound,<br>drug | NF546                           | Tocris                      | 3892                           |                                                                                                                                                                                                                                                                                                                                                            |
| chemical compound,<br>drug | nifedipine                      | Sigma-Aldrich               | N7634                          |                                                                                                                                                                                                                                                                                                                                                            |
| chemical compound,<br>drug | forskolin                       | Sigma-Aldrich               | F6886                          |                                                                                                                                                                                                                                                                                                                                                            |



|                         |                               |                              |                                                  |                                    |
|-------------------------|-------------------------------|------------------------------|--------------------------------------------------|------------------------------------|
| chemical compound, drug | amphotericin B                | Sigma-Aldrich                | A4888                                            |                                    |
| chemical compound, drug | Duolink                       | Sigma                        | 7                                                |                                    |
| software, algorithm     | GraphPad Prism                |                              | GraphPad Prism, RRID: <a href="#">SCR_002798</a> | v6                                 |
| software, algorithm     | Origin                        | OriginLab                    |                                                  | v7.0                               |
| software, algorithm     | ImageJ                        |                              | Fiji, RRID: <a href="#">SCR_002285</a>           | v1.51                              |
| software, algorithm     | pCLAMP10                      | Molecular Devices            |                                                  | v10.3; electrophysiology           |
| software, algorithm     | IonOptix                      | IonOptix                     |                                                  | v6.6; arterial diameter recordings |
| software, algorithm     | Metaflor                      | Molecular Devices            |                                                  | v7.7; FRET                         |
| software, algorithm     | StCamSware                    | Sentech America Incorporated |                                                  | v3.10.0.3086                       |
| hardware                | Laser Speckle Contrast Imager | Moor Instruments             | FLPI-2                                           |                                    |
| software, algorithm     | Moor FLPI Review              | Moor Instruments             | FLPI                                             | v5.0                               |
| software, algorithm     | LASAF                         | Leica                        |                                                  | for GSD imaging                    |
| software, algorithm     | Zen                           | Zeiss                        |                                                  | v2.3 SP1; for Airyscan imaging     |
| software, algorithm     | Fluoview                      | Olympus                      |                                                  | v1.4                               |
| software, algorithm     | CellQuest                     | BD Biosciences               |                                                  | v5.2.1                             |
| software, algorithm     | FlowJo                        | Treestar Inc                 |                                                  | v9.9.6                             |

## Supplementary References

1. Navedo, M.F., *et al.* AKAP150 is required for stuttering persistent Ca<sup>2+</sup> sparklets and angiotensin II-induced hypertension. *Circ Res* **102**, e1-e11 (2008).
2. Nichols, C.B., *et al.* Sympathetic stimulation of adult cardiomyocytes requires association of AKAP5 with a subpopulation of L-type calcium channels. *Circ Res* **107**, 747-756 (2010).
3. Timofeyev, V., *et al.* Adenylyl cyclase subtype-specific compartmentalization: differential regulation of L-type Ca<sup>2+</sup> current in ventricular myocytes. *Circ Res* **112**, 1567-1576 (2013).
4. Davare, M.A., Horne, M.C. & Hell, J.W. Protein phosphatase 2A is associated with class C L-type calcium channels (Cav1.2) and antagonizes channel phosphorylation by cAMP-dependent protein kinase. *J Biol Chem* **275**, 39710-39717 (2000).
5. Allen, M.D., *et al.* Reading dynamic kinase activity in living cells for high-throughput screening. *ACS chemical biology* **1**, 371-376 (2006).
6. Liu, S., Zhang, J. & Xiang, Y.K. FRET-based direct detection of dynamic protein kinase A activity on the sarcoplasmic reticulum in cardiomyocytes. *Biochemical and biophysical research communications* **404**, 581-586 (2011).
7. Fredriksson, S., *et al.* Protein detection using proximity-dependent DNA ligation assays. *Nature biotechnology* **20**, 473-477 (2002).
